# Supplementary material for: Comparison of Machine Leaning Models for Prediction of Acute Pain Severity and On-Treatment Opioid Utilization in Oral Cavity and Oropharyngeal Cancer Patients Receiving Radiation Therapy: Exploratory Analysis from a Large-Scale Retrospective Cohort
Source: bioRxiv or medRxiv preprint supplement (doi:10.1101/2024.02.06.24302341), 2024-02-08
Supplement: Supplementary file [file media-1.pdf]

Supplementary Table S1: DeLong Test results of AUC scores of models predicting acute pain intensity.

| <b>AUC-Models</b>   | <b>DeLong p-value</b> | <b>95% CI</b>   |
|---------------------|-----------------------|-----------------|
| AUC-GBM and AUC-RF  | 0.19                  | -0.015 to 0.076 |
| AUC-GBM and AUC-SVM | 0.16                  | -0.016 to 0.10  |
| AUC-GBM and AUC-LR  | 0.09                  | 0.696 to 0.644  |
| AUC-RF and AUC-LR   | 0.45                  | 0.034 to 0.077  |
| AUC-RF and AUC-SVM  | 0.67                  | -0.042 to 0.07  |
| AUC-SVM and AUC-LR  | 0.7                   | -0.057 to 0.038 |

Supplementary Table S2: DeLong Test results of AUC scores of models predicting MEDD.

| <b>AUC-Models</b>   | <b>DeLong p-value</b> | <b>95% CI</b>    |
|---------------------|-----------------------|------------------|
| AUC-GBM and AUC-RF  | 0.019                 | -0.09 to -0.008  |
| AUC-GBM and AUC-SVM | 0.02                  | -0.126 to -0.011 |
| AUC-GBM and AUC-LR  | 0.007                 | 0.02 to 0.13     |
| AUC-RF and AUC-LR   | 0.227                 | -0.015 to 0.065  |
| AUC-RF and AUC-SVM  | 0.412                 | -0.027 to 0.066  |
| AUC-SVM and AUC-LR  | 0.809                 | -0.037 to 0.048  |

Supplementary Table S3: DeLong Test results of AUC scores of models predicting analgesic efficacy.

| <b>AUC-Models</b>   | <b>DeLong p-value</b> | <b>95% CI</b>   |
|---------------------|-----------------------|-----------------|
| AUC-GBM and AUC-RF  | 0.893                 | -0.047 to 0.041 |
| AUC-GBM and AUC-SVM | 0.462                 | -0.037 to 0.081 |
| AUC-GBM and AUC-LR  | 0.532                 | -0.031 to 0.059 |
| AUC-RF and AUC-LR   | 0.572                 | -0.043 to 0.077 |
| AUC-RF and AUC-SVM  | 0.405                 | -0.034 to 0.084 |
| AUC-SVM and AUC-LR  | 0.772                 | -0.044 to 0.060 |
